# Supplementary material for: Multi-center validation of machine learning model for preoperative prediction of postoperative mortality
Source: PubMed Central journal article supplement (PMC9276734; doi:10.1038/s41746-022-00625-6), 2022-07-12
Supplement: 41746_2022_625_MOESM1_ESM.pdf [file 41746_2022_625_MOESM1_ESM.pdf]

## Supplementary information

### **Multi-center validation of machine learning model for preoperative prediction of postoperative mortality**

Seung Wook Lee BS<sup>1</sup>, Hyung-Chul Lee MD PhD<sup>2</sup>, Jungyo Suh MD<sup>3</sup>, Kyung Hyun Lee BS<sup>4</sup>, Heonyi Lee MS<sup>5</sup>, Suryang Seo ME<sup>6</sup>, Tae Kyong Kim MD PhD<sup>7</sup>, Sang-Wook Lee MD PhD<sup>8\*</sup>, Yi-Jun Kim MD PhD<sup>9\*</sup>.

1. School of Medicine, Kyungpook National University, Daegu, Republic of Korea
2. Department of Anesthesiology and Pain Medicine, Seoul National University Hospital, Seoul National University College of Medicine, Seoul, Republic of Korea
3. Department of Urology, Asan Medical Center, University of Ulsan College of Medicine, Seoul, Republic of Korea
4. Department of Digital Health, SAIHST, Sungkyunkwan University, Seoul, Republic of Korea
5. Bioinformatics Collaboration Unit, Department of Biomedical Systems informatics, Yonsei University College of medicine, Seoul, Republic of Korea
6. Department of Nursing, SMG-SNU Boramae Medical Center, Seoul National University College of Medicine, Seoul, South Korea
7. Department of Anesthesiology and Pain Medicine, SMG-SNU Boramae Medical Center, Seoul National University College of Medicine, Seoul, South Korea
8. Department of Anesthesiology and Pain Medicine, Asan Medical Center, University of Ulsan College of Medicine, Seoul, Republic of Korea
9. Institute of Convergence Medicine, Ewha Womans University Mokdong Hospital, Seoul, Republic of Korea

## Contents

**Supplementary Table 1.** Missing value characteristics

**Supplementary Table 2.(a)** Internal validation result of models trained with incidence-upsampled training data using all features for postoperative 30-day mortality

**Supplementary Table 2.(b)** Internal validation result of models trained with non-incidence downsampled training data using all features for postoperative 30-day mortality

**Supplementary Table 3.(a)** Comparison of AUROC values between several models for postoperative 30-day mortality in each hospital dataset

**Supplementary Table 3.(b)** Comparison of AUPRC values between several models for postoperative 30-day mortality in each hospital dataset

**Supplementary Figure 1.(a)** Nullity Correlation Heatmap of in each hospital

**Supplementary Figure 1.(b)** Distribution of missing values and data completeness of dataset in each hospital

**Supplementary Figure 2.(a)** AUROC and AUPRC of several models for postoperative 30-day mortality in AMC dataset

**Supplementary Figure 2.(b)** AUROC and AUPRC of several models for postoperative 30-day mortality in EUMC dataset

**Supplementary Figure 2.(c)** AUROC and AUPRC of several models for postoperative 30-day mortality in BRMH dataset

**Supplementary Figure 3.(a)** AUROC and AUPRC of lab models for postoperative 30-day mortality in SNUH dataset

**Supplementary Figure 3.(b)** AUROC and AUPRC of lab models for postoperative 30-day mortality in AMC dataset

**Supplementary Figure 3.(c)** AUROC and AUPRC of lab models for postoperative 30-day mortality in EUMC dataset

**Supplementary Figure 3.(d)** AUROC and AUPRC of lab models for postoperative 30-day mortality in BRBH dataset

**Supplementary Figure 4.** ROC and PR curves of XGBoost model of SNUH with 10-fold cross-validation and its test results on the SNUH test set, AMC, EUMC, and BRMH dataset, respectively.

**Supplementary Figure 5.** Calibration curve of XGBoost model of SNUH with 10-fold cross validation on the SNUH test set, AMC, EUMC, and BRMH dataset.

**Supplementary Table 1.** Missing value characteristics

| Characteristics                              | SNUH (n=223,905) |              |                  | AMC (n=66,522) |              |                  | EUMC (n=131,867) |              |                  | BRMH (n=32,110) |              |                  |
|----------------------------------------------|------------------|--------------|------------------|----------------|--------------|------------------|------------------|--------------|------------------|-----------------|--------------|------------------|
|                                              | Available Data   | Missing data | Missing Data (%) | Available Data | Missing data | Missing Data (%) | Available Data   | Missing data | Missing Data (%) | Available Data  | Missing data | Missing Data (%) |
| <b>Demographics</b>                          |                  |              |                  |                |              |                  |                  |              |                  |                 |              |                  |
| Age                                          | 223,905          | 0            | 0.00             | 66,519         | 3            | 0.00             | 131,867          | 0            | 0.00             | 32,110          | 0            | 0.00             |
| Sex                                          | 223,905          | 0            | 0.00             | 66,519         | 3            | 0.00             | 131,867          | 0            | 0.00             | 32,110          | 0            | 0.00             |
| Body Mass Index (BMI)                        | 219,526          | 4,379        | 1.96             | 60,912         | 5,610        | 8.43             | 53,819           | 78,048       | 59.19            | 31,821          | 289          | 0.90             |
| <b>Preoperative Laboratory Tests</b>         |                  |              |                  |                |              |                  |                  |              |                  |                 |              |                  |
| White Blood Cells                            | 214,808          | 9,097        | 4.06             | 64,750         | 1,772        | 2.66             | 131,761          | 106          | 0.08             | 30,287          | 1,823        | 5.68             |
| Hemoglobin                                   | 214,824          | 9,081        | 4.06             | 64,750         | 1,772        | 2.66             | 131,867          | 0            | 0.00             | 21,496          | 10,614       | 33.06            |
| Platelet                                     | 214,568          | 9,337        | 4.17             | 64,750         | 1,772        | 2.66             | 131,757          | 110          | 0.08             | 21,491          | 10,619       | 33.07            |
| Prothrombin Time (PT)                        | 209,293          | 14,612       | 6.53             | 60,766         | 5,756        | 8.65             | 116,473          | 15,394       | 11.67            | 29,758          | 2,352        | 7.32             |
| Activated Partial Thromboplastin Time (aPTT) | 208,823          | 15,082       | 6.74             | 60,375         | 6,147        | 9.24             | 116,945          | 14,922       | 11.32            | 21,382          | 10,728       | 33.41            |
| Sodium                                       | 214,551          | 9,354        | 4.18             | 63,372         | 3,150        | 4.74             | 123,399          | 8,468        | 6.42             | 21,207          | 10,903       | 33.96            |
| Potassium                                    | 214,591          | 9,314        | 4.16             | 63,372         | 3,150        | 4.74             | 123,400          | 8,467        | 6.42             | 21,206          | 10,904       | 33.96            |
| Blood Urea Nitrogen (BUN)                    | 211,146          | 12,759       | 5.70             | 61,420         | 5,102        | 7.67             | 127,193          | 4,674        | 3.54             | 21,386          | 10,724       | 33.40            |
| Creatinine                                   | 211,213          | 12,692       | 5.67             | 64,381         | 2,141        | 3.22             | 127,394          | 4,473        | 3.39             | 21,401          | 10,709       | 33.35            |
| Glutamate Oxaloacetate Transaminase (GOT)    | 210,886          | 13,019       | 5.81             | 64,766         | 1,756        | 2.64             | 127,541          | 4,326        | 3.28             | 21,397          | 10,713       | 33.36            |
| Glutamate Pyruvate Transaminase (GPT)        | 210,892          | 13,013       | 5.81             | 64,766         | 1,756        | 2.64             | 127,539          | 4,328        | 3.28             | 21,397          | 10,713       | 33.36            |
| Albumin                                      | 210,635          | 13,270       | 5.93             | 64,724         | 1,798        | 2.70             | 108,198          | 23,669       | 17.95            | 21,303          | 10,807       | 33.66            |
| <b>Surgical Informations</b>                 |                  |              |                  |                |              |                  |                  |              |                  |                 |              |                  |
| Emergency status of surgery                  | 223,503          | 402          | 0.18             | 66,519         | 3            | 0.00             | 131,867          | 0            | 0.00             | 25,347          | 6,763        | 21.06            |
| Department of Surgery                        | 223,897          | 8            | 0.00             | 57,623         | 8,899        | 13.38            | 131,867          | 0            | 0.00             | 32,099          | 11           | 0.03             |
| Type of Anesthesia                           | 223,897          | 8            | 0.00             | 57,747         | 8,775        | 13.19            | 21,525           | 110,342      | 83.68            | 32,110          | 0            | 0.00             |
| ASA-PS Class                                 | 209,215          | 14,690       | 6.56             | 58,881         | 7,641        | 11.49            | 0                | 131,867      | 100.00           | 30,831          | 1,279        | 3.98             |
| Mean of missing data (%)                     |                  |              | 3.76             |                |              | 5.30             |                  |              | 16.33            |                 |              | 19.66            |

SNUH, Seoul national university hospital; AMC, Asan medical center; EUMC, Ewha womans university medical center; BRMH, Boramae hospital.

**Supplementary Table 2.(a)** Internal validation result of models trained with incidence-upsampled training data using all features for postoperative 30-day mortality

|        |                     | Upsampling ratio ( $N_m/N_M$ ) |                     |                     |                     |
|--------|---------------------|--------------------------------|---------------------|---------------------|---------------------|
| Center | Reference           | AUROC                          |                     |                     |                     |
|        |                     | 0.01                           | 0.05                | 0.1                 | 0.25                |
| SNUH   | 0.942 (0.940-0.945) | 0.939 (0.934-0.945)            | 0.942 (0.938-0.946) | 0.936 (0.931-0.94)  | 0.936 (0.933-0.94)  |
| AMC    | 0.935 (0.930-0.939) | 0.932 (0.924-0.941)            | 0.934 (0.924-0.943) | 0.94 (0.932-0.947)  | 0.925 (0.918-0.931) |
| EUMC   | 0.956 (0.953-0.958) | 0.957 (0.953-0.961)            | 0.954 (0.949-0.959) | 0.956 (0.952-0.961) | 0.949 (0.945-0.952) |
| BRMH   | 0.916 (0.909-0.923) | 0.917 (0.906-0.929)            | 0.911 (0.897-0.925) | 0.928 (0.918-0.938) | 0.903 (0.894-0.912) |
|        |                     | AUPRC                          |                     |                     |                     |
| Center | Reference           | AUPRC                          |                     |                     |                     |
|        |                     | 0.01                           | 0.05                | 0.1                 | 0.25                |
| SNUH   | 0.175 (0.169-0.181) | 0.158 (0.145-0.171)            | 0.156 (0.145-0.168) | 0.139 (0.129-0.149) | 0.13 (0.122-0.137)  |
| AMC    | 0.092 (0.084-0.100) | 0.088 (0.075-0.1)              | 0.091 (0.075-0.107) | 0.079 (0.069-0.09)  | 0.071 (0.061-0.081) |
| EUMC   | 0.155 (0.147-0.163) | 0.145 (0.131-0.16)             | 0.139 (0.125-0.153) | 0.133 (0.117-0.149) | 0.11 (0.101-0.118)  |
| BRMH   | 0.142 (0.131-0.153) | 0.147 (0.121-0.172)            | 0.143 (0.121-0.165) | 0.133 (0.11-0.156)  | 0.128 (0.11-0.146)  |

**Supplementary Table 2.(b)** Internal validation result of models trained with non-incidence downsampled training data using all features for postoperative 30-day mortality

|        |                     | Downsampling ratio ( $N_m/N_{rM}$ ) |                     |                     |                     |
|--------|---------------------|-------------------------------------|---------------------|---------------------|---------------------|
| Center | Reference           | AUROC                               |                     |                     |                     |
|        |                     | 0.01                                | 0.05                | 0.1                 | 0.25                |
| SNUH   | 0.942 (0.940-0.945) | 0.94 (0.935-0.946)                  | 0.941 (0.936-0.945) | 0.944 (0.94-0.949)  | 0.94 (0.935-0.945)  |
| AMC    | 0.935 (0.930-0.939) | 0.935 (0.924-0.945)                 | 0.93 (0.918-0.941)  | 0.933 (0.924-0.941) | 0.927 (0.919-0.935) |
| EUMC   | 0.956 (0.953-0.958) | 0.955 (0.951-0.959)                 | 0.954 (0.949-0.959) | 0.953 (0.949-0.957) | 0.954 (0.95-0.959)  |
| BRMH   | 0.916 (0.909-0.923) | 0.921 (0.905-0.937)                 | 0.929 (0.917-0.94)  | 0.927 (0.917-0.937) | 0.923 (0.912-0.934) |
|        |                     | AUPRC                               |                     |                     |                     |
| Center | Reference           | AUPRC                               |                     |                     |                     |
|        |                     | 0.01                                | 0.05                | 0.1                 | 0.25                |
| SNUH   | 0.175 (0.169-0.181) | 0.174 (0.164-0.185)                 | 0.15 (0.141-0.159)  | 0.149 (0.138-0.159) | 0.126 (0.116-0.137) |
| AMC    | 0.092 (0.084-0.100) | 0.089 (0.077-0.102)                 | 0.089 (0.073-0.104) | 0.087 (0.073-0.1)   | 0.069 (0.058-0.08)  |
| EUMC   | 0.155 (0.147-0.163) | 0.145 (0.131-0.16)                  | 0.139 (0.123-0.154) | 0.115 (0.105-0.126) | 0.107 (0.094-0.119) |
| BRMH   | 0.142 (0.131-0.153) | 0.147 (0.12-0.174)                  | 0.129 (0.105-0.153) | 0.123 (0.099-0.146) | 0.103 (0.086-0.119) |

Data are presented as means (95% confidence intervals).

AUROC, area under receiver operating characteristic curve; AUPRC, area under precision-recall curve;  $N_m$ , number of samples reporting postoperative 30-day mortality after resampling;  $N_M$ , number of samples not reporting postoperative 30-day mortality;  $N_m$ , number of samples reporting postoperative 30-day mortality;  $N_{rM}$ , number of samples not reporting postoperative 30-day mortality after resampling; SNUH, Seoul national university hospital; AMC, Asan medical center; EUMC, Ewha womans university medical center; BRMH, Boramae hospital.

**Supplementary Table 3. (a)** Comparison of AUROC values between several models for postoperative 30-day mortality in each hospital dataset

| SNUH model using all features |        |        |        |        |        |
|-------------------------------|--------|--------|--------|--------|--------|
|                               | XGB    | DNN    | RF     | LR     | ASA-PS |
| XGB                           |        | 0.5163 | 0.0480 | 0.4636 | 0.0000 |
| DNN                           | 0.5163 |        | 0.0881 | 0.3851 | 0.0000 |
| RF                            | 0.0480 | 0.0881 |        | 0.0254 | 0.0816 |
| LR                            | 0.4636 | 0.3851 | 0.0254 |        | 0.0000 |
| ASA-PS                        | 0.0000 | 0.0000 | 0.0816 | 0.0000 |        |

  

| SNUH models using lab features |        |        |        |        |        |
|--------------------------------|--------|--------|--------|--------|--------|
|                                | XGB    | DNN    | RF     | LR     | ASA-PS |
| XGB                            |        | 0.3187 | 0.0262 | 0.2039 | 0.0000 |
| DNN                            | 0.3187 |        | 0.1746 | 0.5833 | 0.0013 |
| RF                             | 0.0262 | 0.1746 |        | 0.1221 | 0.0609 |
| LR                             | 0.2039 | 0.5833 | 0.1221 |        | 0.0007 |
| ASA-PS                         | 0.0000 | 0.0013 | 0.0609 | 0.0007 |        |

  

| AMC model using all features |        |        |        |        |        |
|------------------------------|--------|--------|--------|--------|--------|
|                              | XGB    | DNN    | RF     | LR     | ASA-PS |
| XGB                          |        | 0.0547 | 0.0070 | 0.5987 | 0.0016 |
| DNN                          | 0.0547 |        | 0.1839 | 0.0949 | 0.3697 |
| RF                           | 0.0070 | 0.1839 |        | 0.0071 | 0.4331 |
| LR                           | 0.5987 | 0.0949 | 0.0071 |        | 0.0066 |
| ASA-PS                       | 0.0016 | 0.3697 | 0.4331 | 0.0066 |        |

  

| AMC models using lab features |        |        |        |        |        |
|-------------------------------|--------|--------|--------|--------|--------|
|                               | XGB    | DNN    | RF     | LR     | ASA-PS |
| XGB                           |        | 0.3140 | 0.0291 | 0.4782 | 0.0017 |
| DNN                           | 0.3140 |        | 0.2120 | 0.3517 | 0.1128 |
| RF                            | 0.0291 | 0.2120 |        | 0.0832 | 0.3534 |
| LR                            | 0.4782 | 0.3517 | 0.0832 |        | 0.0106 |
| ASA-PS                        | 0.0017 | 0.1128 | 0.3534 | 0.0106 |        |

  

| EUMC models using all features |        |        |        |        |
|--------------------------------|--------|--------|--------|--------|
|                                | XGB    | DNN    | RF     | LR     |
| XGB                            |        | 0.1730 | 0.0129 | 0.5933 |
| DNN                            | 0.1730 |        | 0.2981 | 0.1763 |
| RF                             | 0.0129 | 0.2981 |        | 0.0312 |
| LR                             | 0.5933 | 0.1763 | 0.0312 |        |

  

| EUMC models using lab features |        |        |        |        |
|--------------------------------|--------|--------|--------|--------|
|                                | XGB    | DNN    | RF     | LR     |
| XGB                            |        | 0.4131 | 0.0367 | 0.5083 |
| DNN                            | 0.4131 |        | 0.0695 | 0.2799 |
| RF                             | 0.0367 | 0.0695 |        | 0.0986 |
| LR                             | 0.5083 | 0.2799 | 0.0986 |        |

  

| BRMH models using all features |        |        |        |        |        |
|--------------------------------|--------|--------|--------|--------|--------|
|                                | XGB    | DNN    | RF     | LR     | ASA-PS |
| XGB                            |        | 0.0395 | 0.0394 | 0.4909 | 0.1219 |
| DNN                            | 0.0395 |        | 0.4882 | 0.0190 | 0.3175 |
| RF                             | 0.0394 | 0.4882 |        | 0.0242 | 0.2661 |
| LR                             | 0.4909 | 0.0190 | 0.0242 |        | 0.0804 |
| ASA-PS                         | 0.1219 | 0.3175 | 0.2661 | 0.0804 |        |

  

| BRMH models using lab features |        |        |        |        |        |
|--------------------------------|--------|--------|--------|--------|--------|
|                                | XGB    | DNN    | RF     | LR     | ASA-PS |
| XGB                            |        | 0.0416 | 0.0991 | 0.6180 | 0.3140 |
| DNN                            | 0.0416 |        | 0.5181 | 0.0332 | 0.2563 |
| RF                             | 0.0991 | 0.5181 |        | 0.1094 | 0.3268 |
| LR                             | 0.6180 | 0.0332 | 0.1094 |        | 0.3642 |
| ASA-PS                         | 0.3140 | 0.2563 | 0.3268 | 0.3642 |        |

**Supplementary Table 3. (b)** Comparison of AUPRC values between several models for postoperative 30-day mortality in each hospital dataset

| SNUH model using all features |        |        |        |        |        | SNUH models using lab features |        |        |        |        |        |
|-------------------------------|--------|--------|--------|--------|--------|--------------------------------|--------|--------|--------|--------|--------|
|                               | XGB    | DNN    | RF     | LR     | ASA-PS |                                | XGB    | DNN    | RF     | LR     | ASA-PS |
| XGB                           |        | 0.3032 | 0.0240 | 0.0312 | 0.0004 | XGB                            |        | 0.3040 | 0.0060 | 0.0144 | 0.0000 |
| DNN                           | 0.7012 |        | 0.0808 | 0.1236 | 0.0004 | DNN                            | 0.6896 |        | 0.0196 | 0.0204 | 0.0004 |
| RF                            | 0.9768 | 0.9256 |        | 0.7824 | 0.0016 | RF                             | 0.9900 | 0.9752 |        | 0.7204 | 0.0024 |
| LR                            | 0.9736 | 0.8748 | 0.1944 |        | 0.0000 | LR                             | 0.9812 | 0.9712 | 0.2800 |        | 0.0004 |
| ASA-PS                        | 1.0000 | 1.0000 | 0.9988 | 1.0000 |        | ASA-PS                         | 1.0000 | 0.9996 | 0.9984 | 1.0000 |        |

  

| AMC model using all features |        |        |        |        |        | AMC models using lab features |        |        |        |        |        |
|------------------------------|--------|--------|--------|--------|--------|-------------------------------|--------|--------|--------|--------|--------|
|                              | XGB    | DNN    | RF     | LR     | ASA-PS |                               | XGB    | DNN    | RF     | LR     | ASA-PS |
| XGB                          |        | 0.1036 | 0.0744 | 0.3360 | 0.0220 | XGB                           |        | 0.2660 | 0.1680 | 0.6064 | 0.0436 |
| DNN                          | 0.9036 |        | 0.3712 | 0.8356 | 0.1028 | DNN                           | 0.7300 |        | 0.3364 | 0.7860 | 0.0620 |
| RF                           | 0.9364 | 0.6200 |        | 0.8756 | 0.1816 | RF                            | 0.8288 | 0.6292 |        | 0.8924 | 0.1348 |
| LR                           | 0.6428 | 0.1540 | 0.1268 |        | 0.0356 | LR                            | 0.3856 | 0.1984 | 0.1236 |        | 0.0428 |
| ASA-PS                       | 0.9692 | 0.8968 | 0.8040 | 0.9584 |        | ASA-PS                        | 0.9608 | 0.9444 | 0.8624 | 0.9608 |        |

  

| EUMC models using all features* |        |        |        |        | EUMC models using lab features* |        |        |        |        |
|---------------------------------|--------|--------|--------|--------|---------------------------------|--------|--------|--------|--------|
|                                 | XGB    | DNN    | RF     | LR     |                                 | XGB    | DNN    | RF     | LR     |
| XGB                             |        | 0.2676 | 0.1460 | 0.3676 | XGB                             |        | 0.6272 | 0.1328 | 0.2972 |
| DNN                             | 0.7416 |        | 0.2988 | 0.6128 | DNN                             | 0.3812 |        | 0.0924 | 0.2060 |
| RF                              | 0.8512 | 0.6848 |        | 0.8024 | RF                              | 0.8504 | 0.9112 |        | 0.6828 |
| LR                              | 0.6244 | 0.4012 | 0.2024 |        | LR                              | 0.7048 | 0.7920 | 0.3272 |        |

  

| BRMH models using all features |        |        |        |        |        | BRMH models using lab features |        |        |        |        |        |
|--------------------------------|--------|--------|--------|--------|--------|--------------------------------|--------|--------|--------|--------|--------|
|                                | XGB    | DNN    | RF     | LR     | ASA-PS |                                | XGB    | DNN    | RF     | LR     | ASA-PS |
| XGB                            |        | 0.4868 | 0.5148 | 0.7988 | 0.0796 | XGB                            |        | 0.2868 | 0.2016 | 0.5808 | 0.0796 |
| DNN                            | 0.5116 |        | 0.5356 | 0.8224 | 0.1384 | DNN                            | 0.7160 |        | 0.4576 | 0.8332 | 0.1848 |
| RF                             | 0.4852 | 0.4600 |        | 0.7600 | 0.1156 | RF                             | 0.7960 | 0.5656 |        | 0.8372 | 0.1744 |
| LR                             | 0.1980 | 0.1708 | 0.2420 |        | 0.0380 | LR                             | 0.4160 | 0.1796 | 0.1636 |        | 0.0556 |
| ASA-PS                         | 0.9084 | 0.8572 | 0.8696 | 0.9532 |        | ASA-PS                         | 0.9208 | 0.8256 | 0.8180 | 0.9300 |        |

AUROC, area under receiver operating characteristic curve; AUPRC, area under precision-recall curve; DNN, deep neural network; XGB, extreme gradient boosting; RF, random forest; LR, logistic regression; ASA-PS, American society of anesthesiologists physical status classification; SNUH, Seoul national university hospital; AMC, Asan medical center; EUMC, Ewha womans university medical center; BRMH, Boramae hospital

Lab features: Preoperative laboratory data; Consisted of white blood cells (WBCs), hemoglobin, platelet, prothrombin time (PT), activated partial thromboplastin time (aPTT), sodium, potassium, blood urea nitrogen (BUN), creatinine, glutamate oxaloacetate transaminase (GOT), glutamate pyruvate transaminase (GPT), and albumin.

All features: Preoperative laboratory data, patient demographics, and surgical information; Consisted of every lab feature, age, sex, height, weight, BMI, status of surgery, department of surgery, and type of anesthesia (general anesthesia, regional anesthesia).

\*ASA-PS model is not provided in EUMC dataset due to absence of ASA-PS in the dataset.



**Supplementary Figure 1.(b)** Distribution of missing values and data completeness of dataset in each hospital

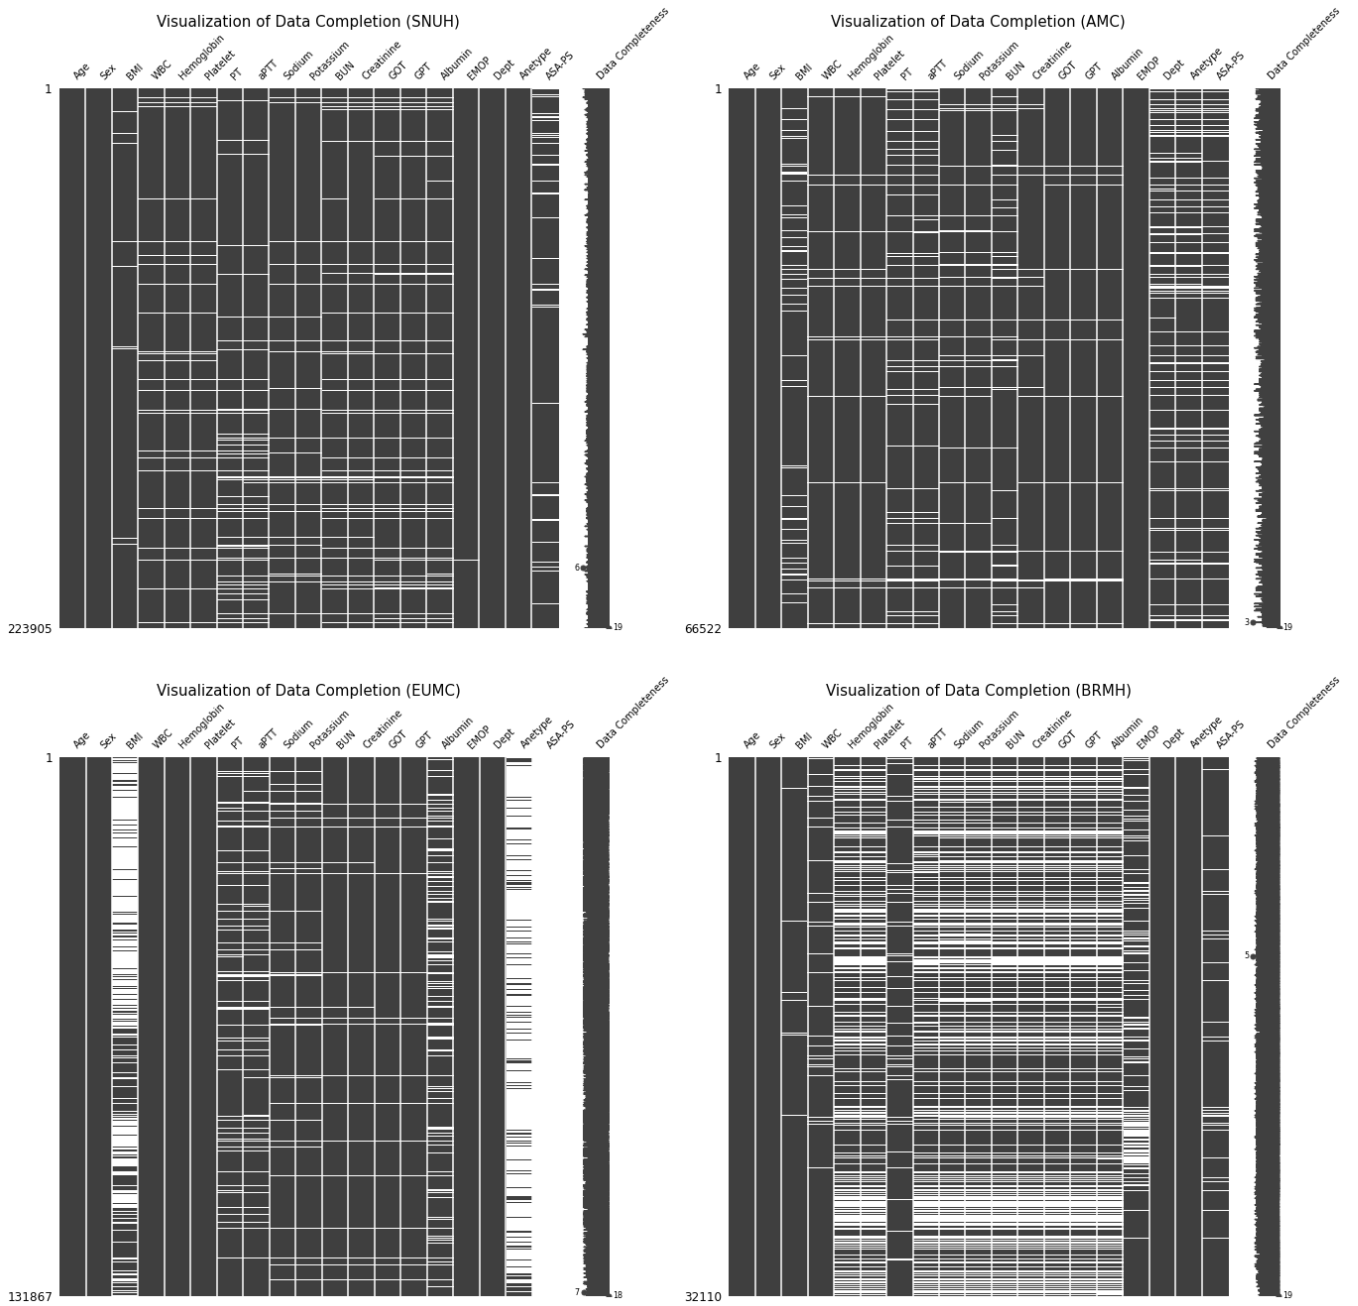



**Supplementary Figure 2.(a)** AUROC and AUPRC of several models for postoperative 30-day mortality in AMC dataset

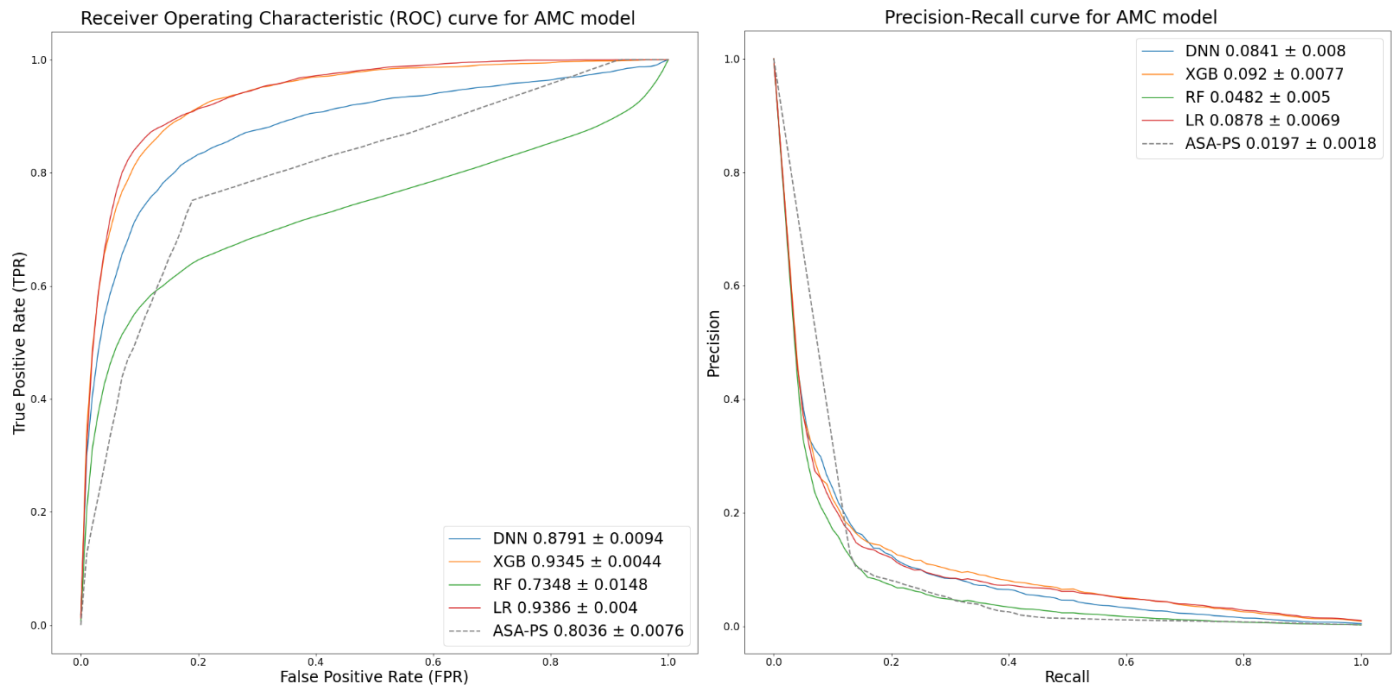

**Supplementary Figure 2.(b)** AUROC and AUPRC of several models for postoperative 30-day mortality in EUMC dataset. The ASA-PS line is omitted due to the absence of ASA-PS data in EUMC.

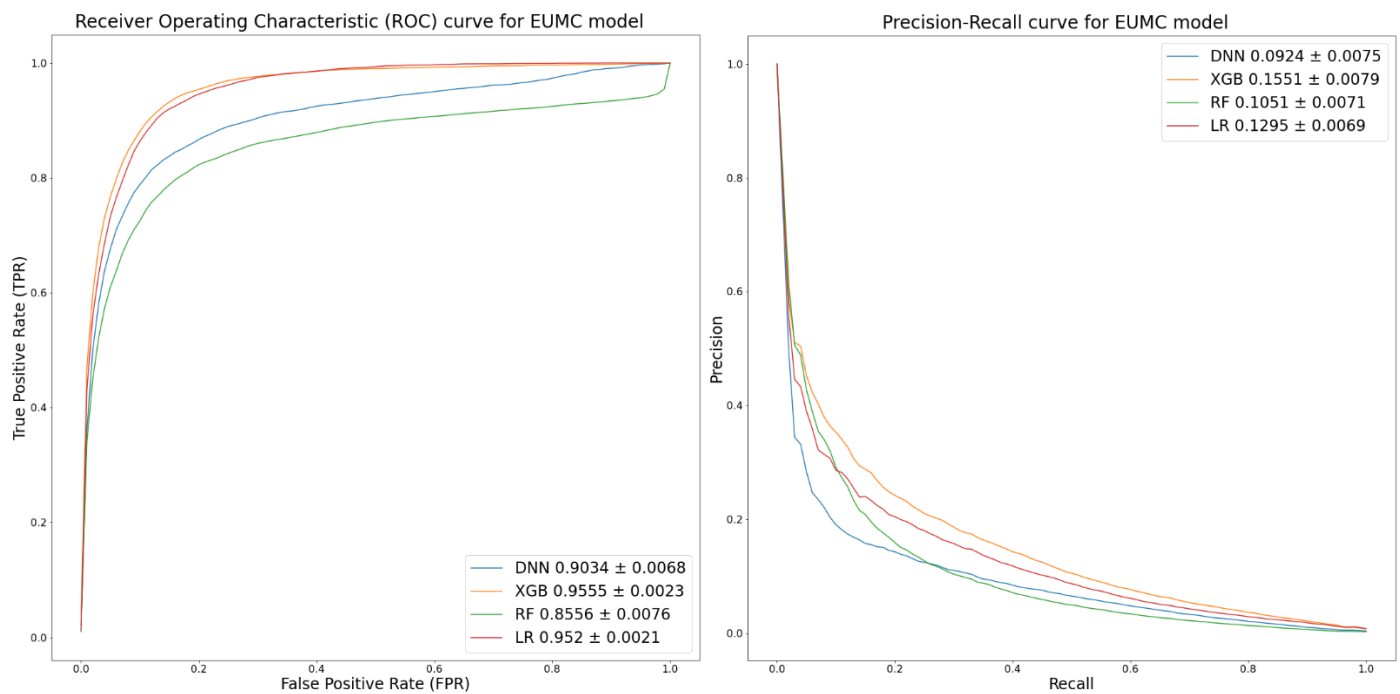

**Supplementary Figure 2.(c)** AUROC and AUPRC of several models for postoperative 30-day mortality in BRMH dataset

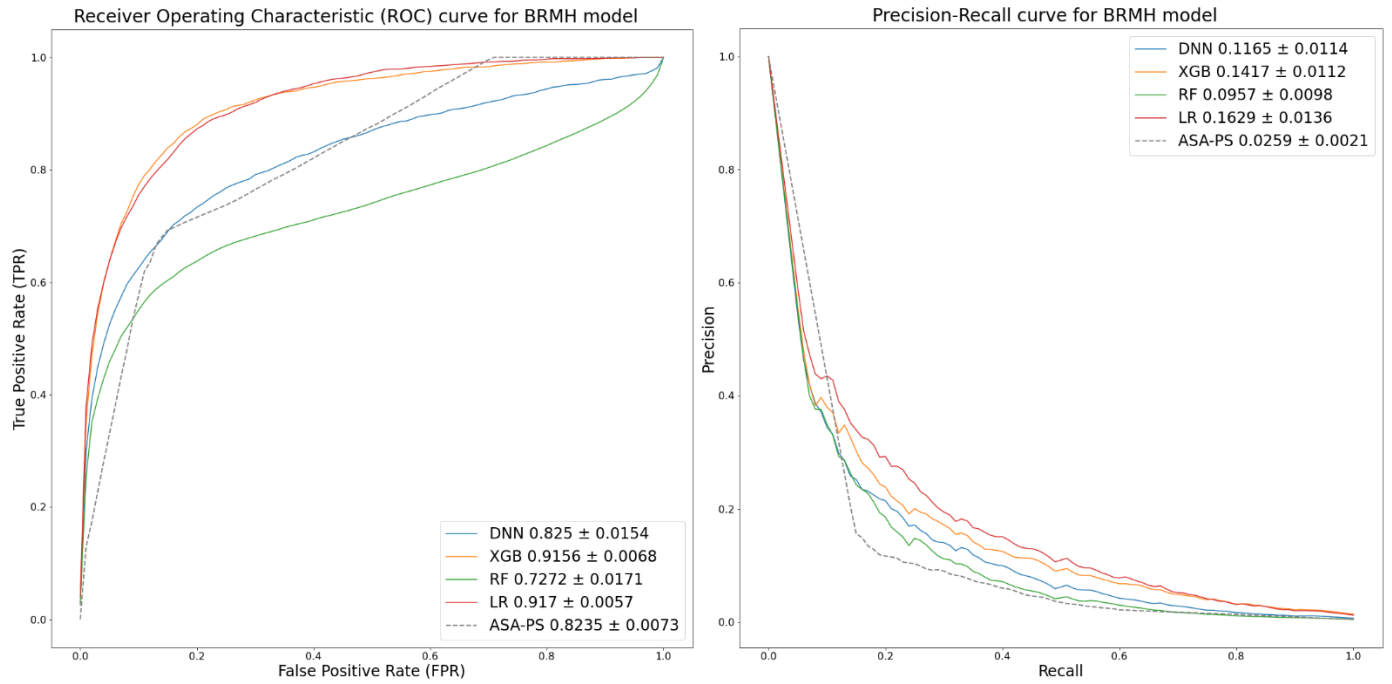

AUROC, area under receiver operating characteristic curve; AUPRC, area under precision-recall curve; DNN, deep neural network; XGB, extreme gradient boosting; RF, random forest; LR, logistic regression; ASA-PS, American Society of Anesthesiologists Physical Status Classification; AMC, Asan Medical Center; EUMC, Ewha Women's University Medical Center; BRMH, Boramae Hospital.

**Supplementary Figure 3.(a)** AUROC and AUPRC of lab models for postoperative 30-day mortality in SNUH dataset

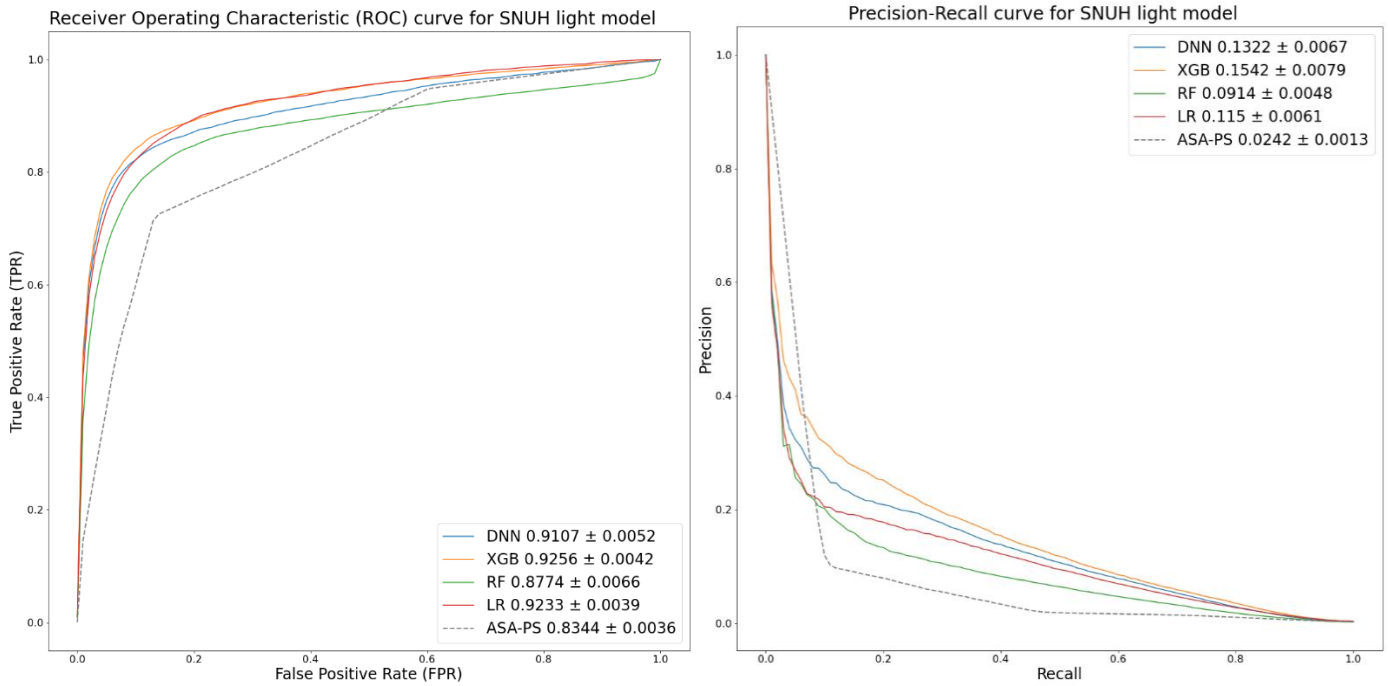

**Supplementary Figure 3.(b)** AUROC and AUPRC of lab models for postoperative 30-day mortality in AMC dataset

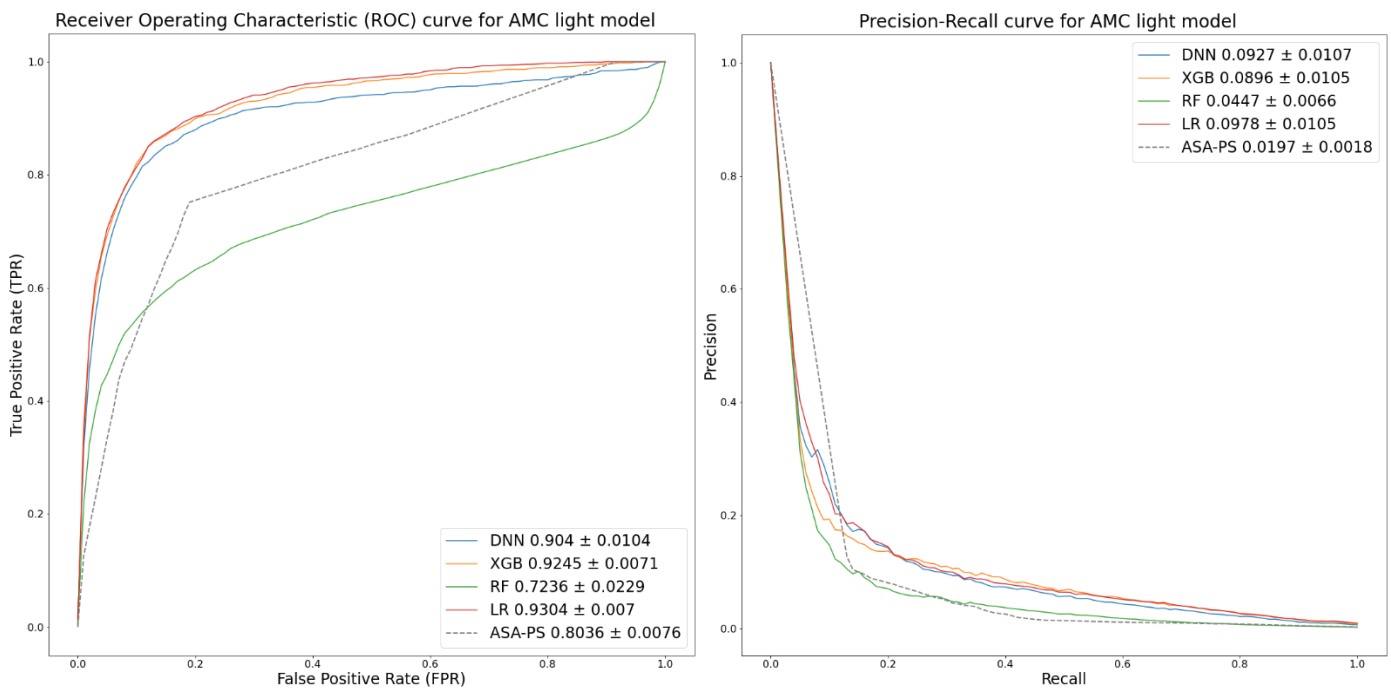

**Supplementary Figure 3.(c)** AUROC and AUPRC of lab models for postoperative 30-day mortality in EUMC dataset. The ASA-PS line is omitted due to the absence of ASA-PS data in EUMC.

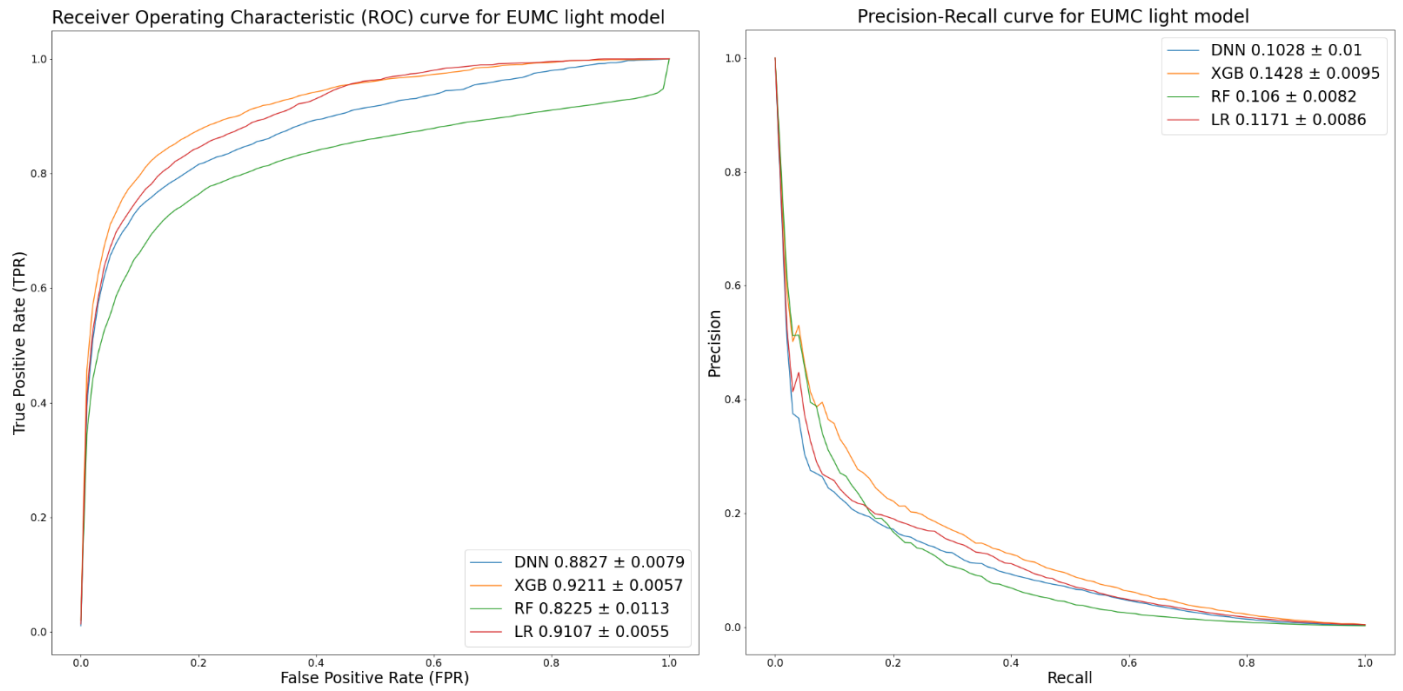

**Supplementary Figure 3.(d)** AUROC and AUPRC of lab models for postoperative 30-day mortality in BRBH dataset

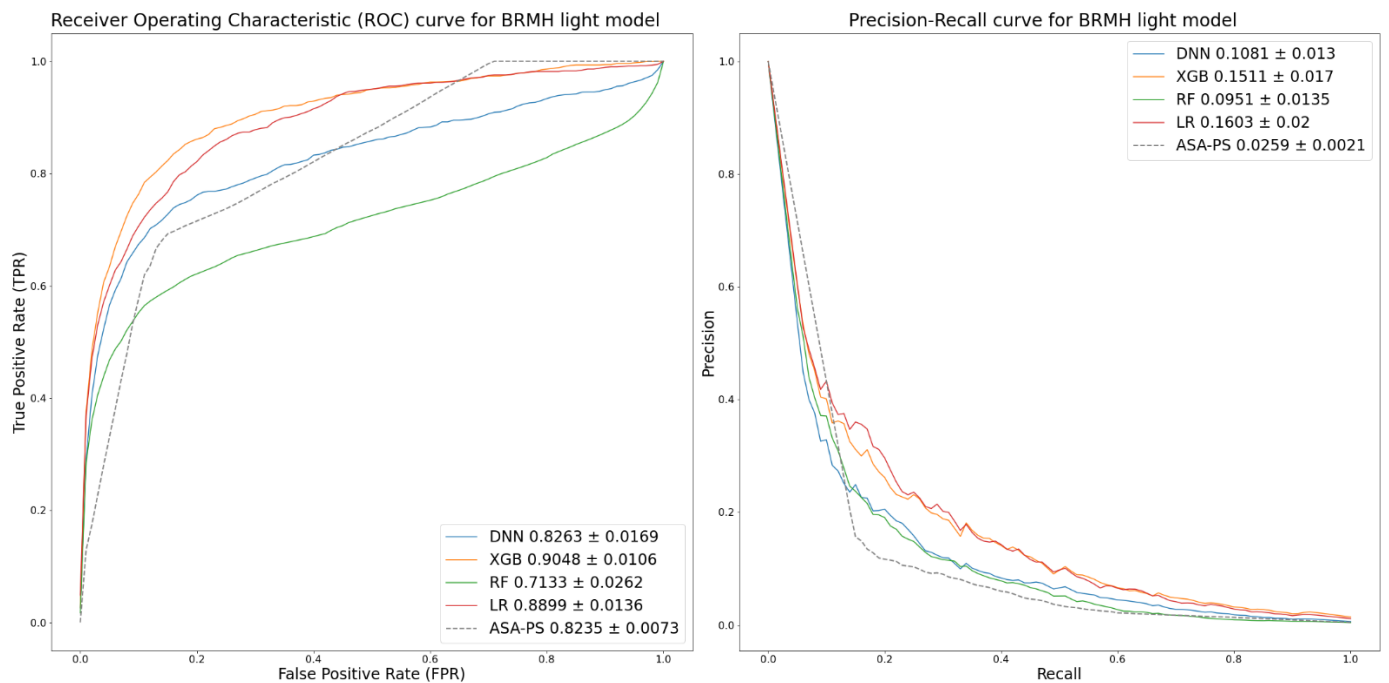

AUROC, area under receiver operating characteristic curve; AUPRC, area under precision-recall curve; DNN, deep neural network; XGB, extreme gradient boosting; RF, random forest; LR, logistic regression; ASA-PS, American Society of Anesthesiologists Physical Status Classification; SNUH, Seoul National University Hospital; AMC, Asan Medical Center; EUMC, Ewha Womans University Medical Center; BRMH, Boramae Hospital.

**Supplementary Figure 4.** ROC and PR curves of XGBoost model of SNUH with 10-fold cross validation and its test results on the SNUH test set, AMC, EUMC, and BRMH dataset, respectively.

(a) ROC curve of SNUH with 10-folds cross validation

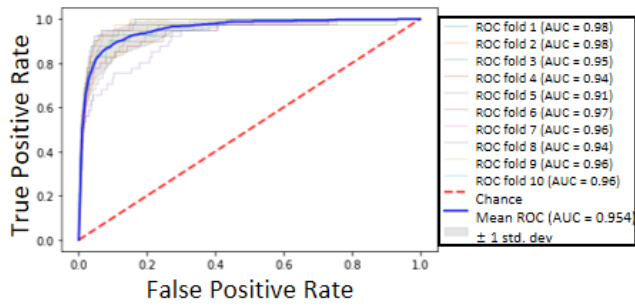

(b) PR curve of SNUH with 10-folds cross validation

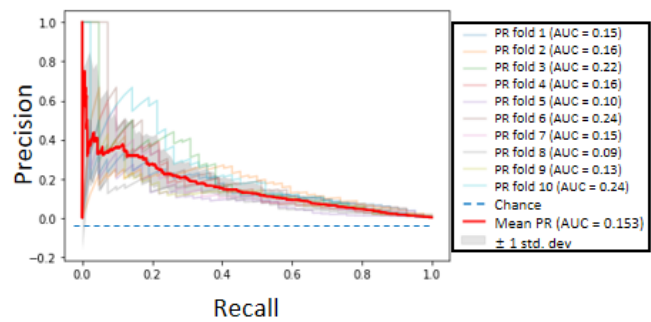

(c) ROC curve of SNUH test set

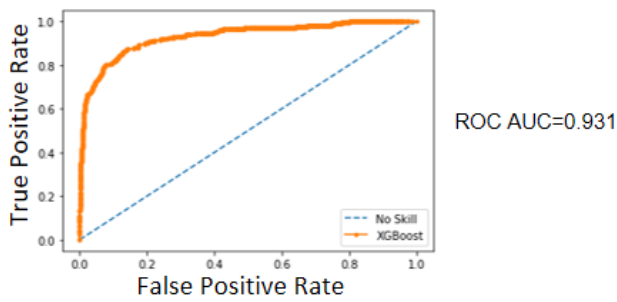

(d) PR curve of SNUH test set

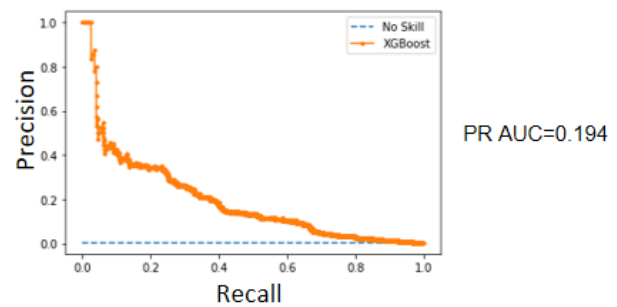

(e) ROC curve of AMC

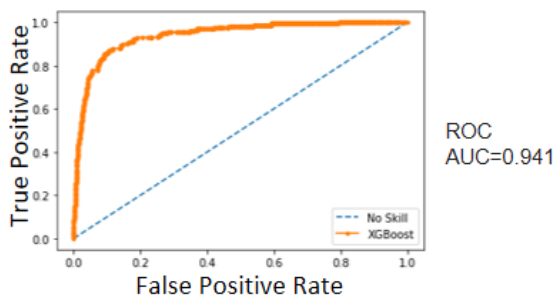

(f) PR curve of AMC

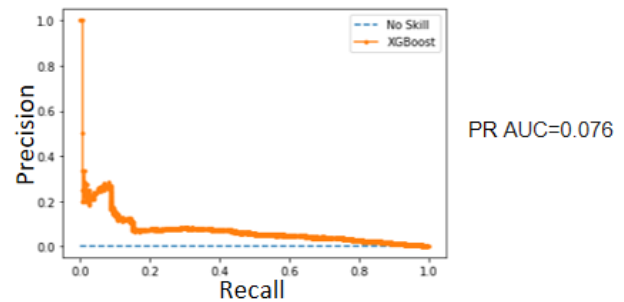

(g) ROC curve of EUMC

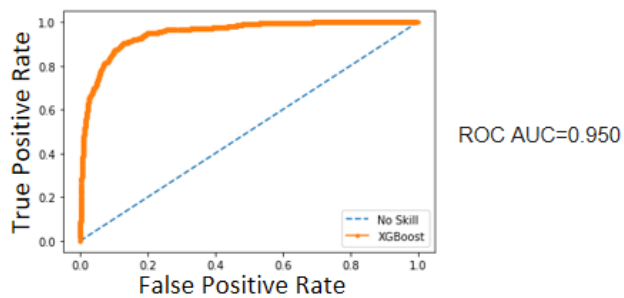

(h) PR curve of EUMC

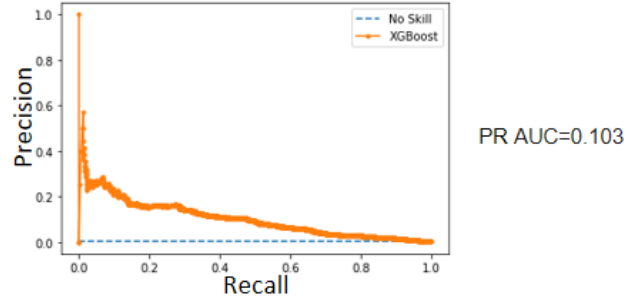

(i) ROC curve of BRMH

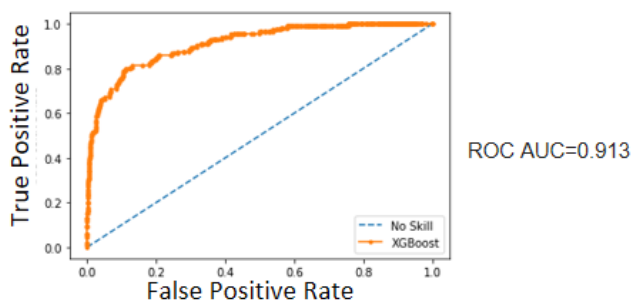

(j) PR curve of BRMH

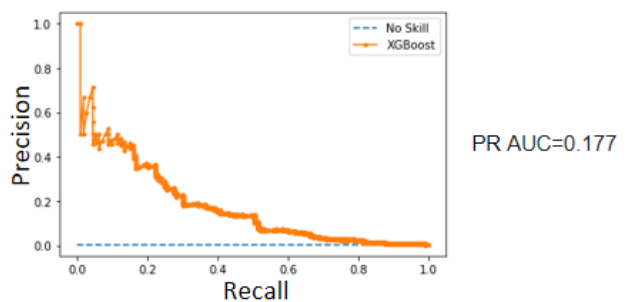

ROC, receiver operating characteristic; PR, precision-recall; AUC, area under the curve; SNUH, Seoul national university hospital; AMC, Asan medical center; EUMC, Ewha womans university hospital; BRMH, Boramae hospital.

**Supplementary Figure 5.** Calibration curve of XGBoost model of SNUH with 10-fold cross validation on the SNUH test set, AMC, EUMC, and BRMH datasets.

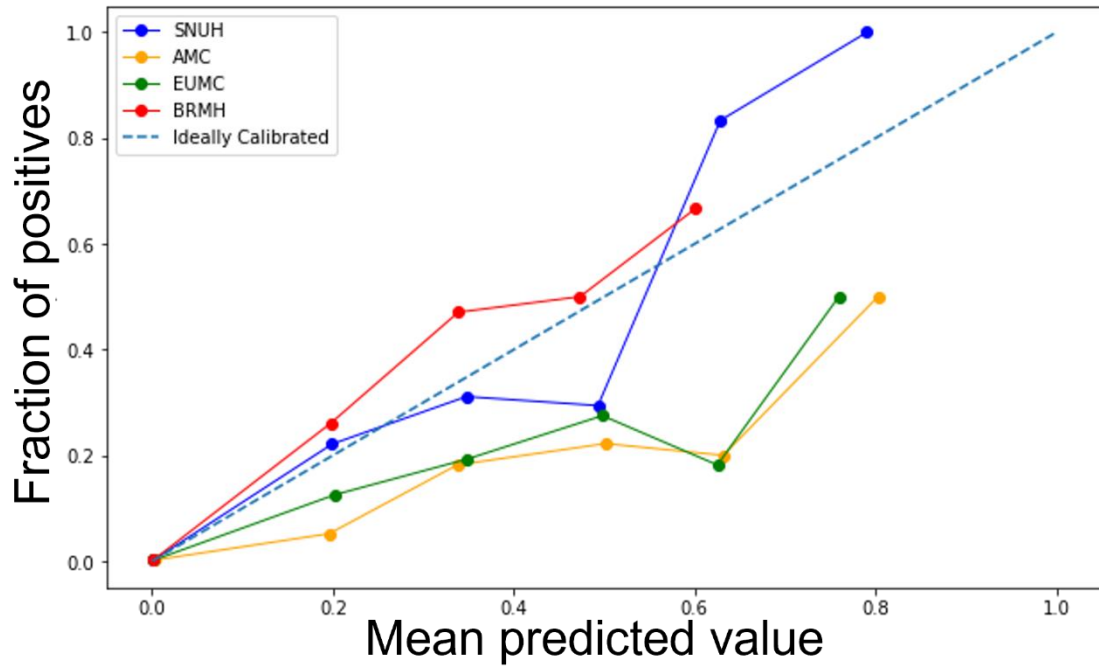

SNUH, Seoul national university hospital; AMC, Asan medical center; EUMC, Ewha womans university hospital; BRMH, Boramae hospital.
